# Supplementary material for: Long-Term Efficacy and Safety of RNAi-Mediated Virus Resistance in ‘HoneySweet’ Plum
Source: PubMed Central journal article supplement (PMC8546108; doi:10.3389/fpls.2021.726881), 2021-10-12
Supplement: Data_Sheet_6.pdf [file Data_Sheet_6.pdf]

Supplementary Figure 1. 'Honeysweet' fruit

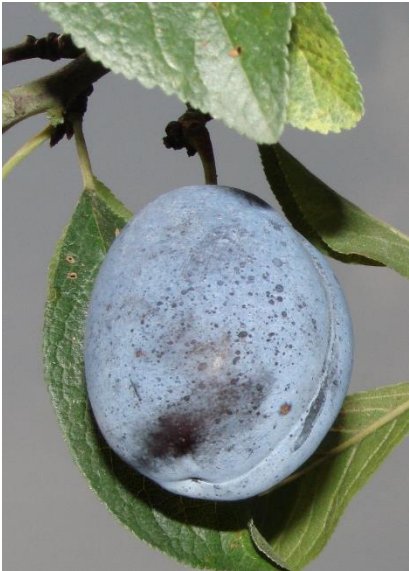

Supplementary Figure 2. PPV-REC graft inoculated ‘HoneySweet’ tree experiment. ‘HoneySweet’ trees were inoculated with a graft bud of ‘Emma Leppermann’ infected with PPV strain REC. The graft was removed from half of the trees 9 years later. Visual symptoms of PPV infection on ‘Emma Leppermann’ are not easily detected, yet PCR tests were positive in the first year on while the ‘HoneySweet’ scion were always negative.

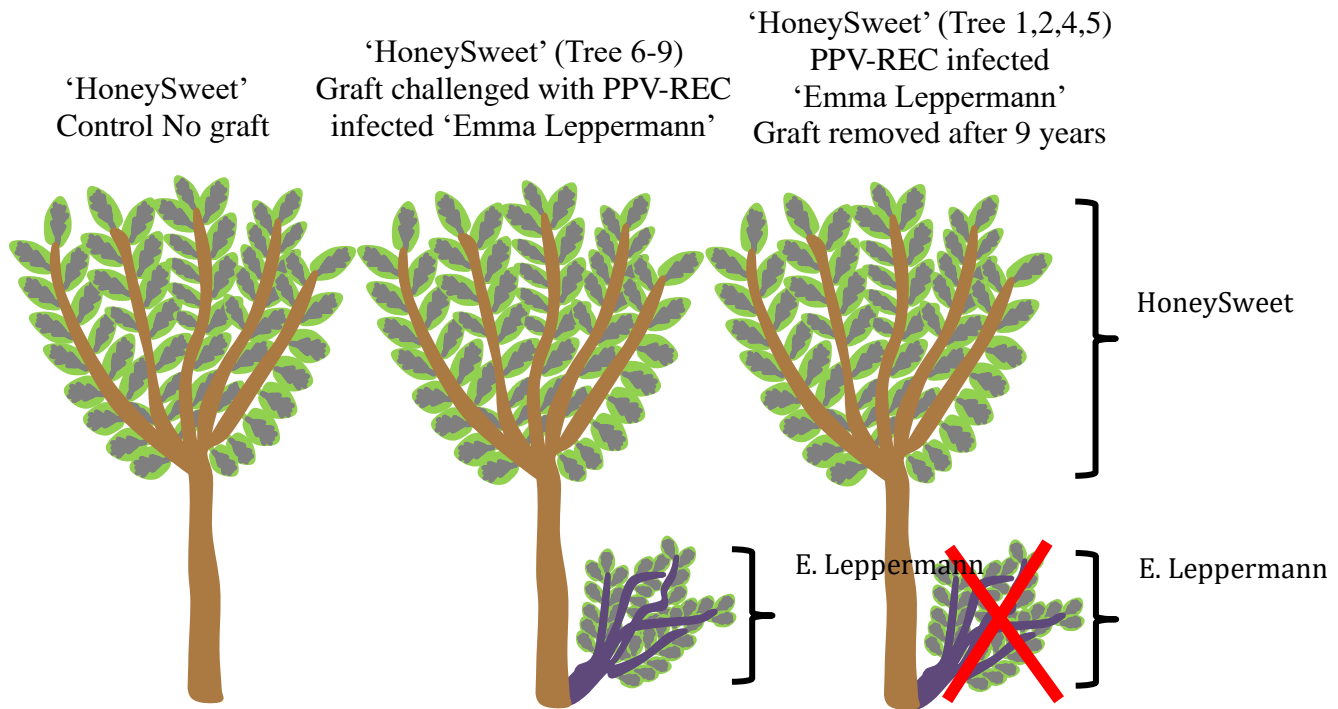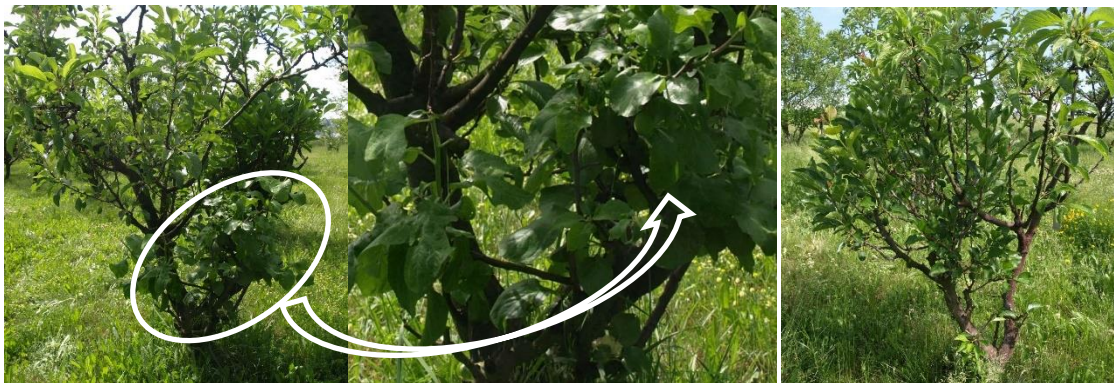

‘HoneySweet’ exhibiting the ‘Emma Leppermann’ graft in the lower part of the

‘HoneySweet’ tree where the graft has been removed

Supplementary Figure 3. Distribution of sRNA sizes in multi-location trees and graft infected trees.

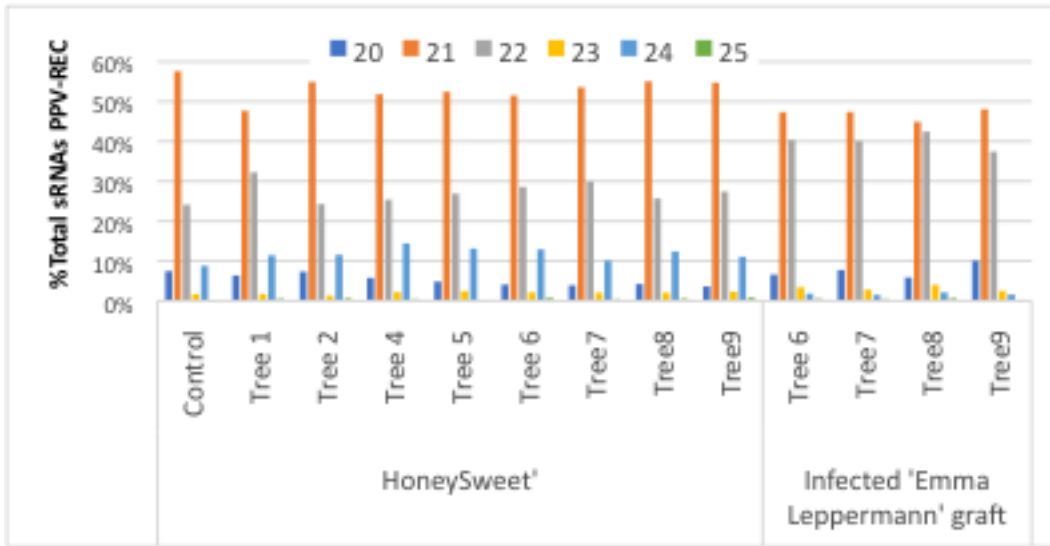

A. Size distribution in 7 individual 'HoneySweet' trees exposed to PPV-REC and control as well as 4 PPV-REC infected 'Emma Leppermann' grafts.

B. Size distribution in 'HoneySweet' and naturally infected 'Stanley' fruit and leaf from multi-locations

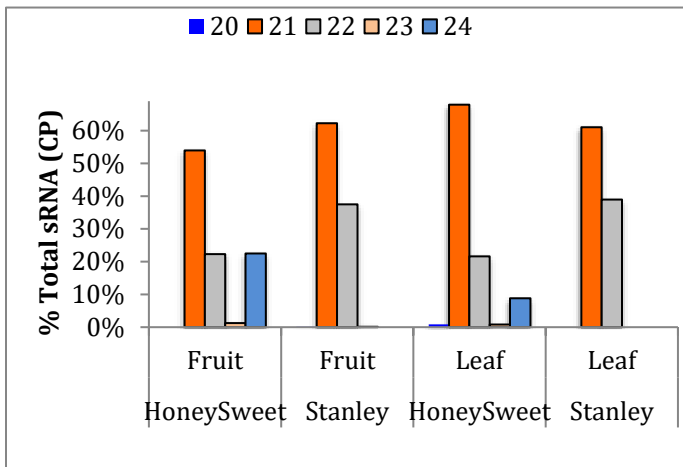

C. Size distribution in 'HoneySweet' leaf from control (full color) and graft challenged (lighter).

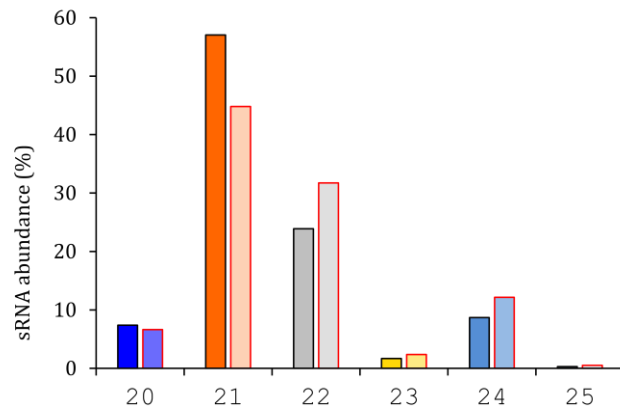

Supplementary Figure 4. PPV-CP comparison between PPV-D (D00298) and PPV-REC (JQ794501).

|          |      |                                                               |                    |      |
|----------|------|---------------------------------------------------------------|--------------------|------|
| D00298   | 1    |                                                               | GUCCAGACGUUGUUGUGG | 18   |
| JQ794501 | 8701 | GAUAUCUUGAAGCAUUUUACAUGAUUAUGAUGAUAGCCUUGACUCCAACAUGUUUAUA-   |                    | 8759 |
|          |      |                                                               | * * * * *          |      |
| D00298   | 19   | CACCAAGCUGACGAAAGAGAGGACGAGGAGGAAGUUGAUGCAGGCAAGCCGAUUGUAGUU  |                    | 78   |
| JQ794501 | 8760 | CACCAGGCUGAUGAAAAGGAGGACGAUGAAGAAGUCGAUGCAGGAAAACCCACUGUAGUA  |                    | 8819 |
|          |      | *****                                                         |                    |      |
| D00298   | 79   | ACUGCACCGGCAGCAACUAGCCCAAUACUUAACCACCUCAGUCAUACAGCCUGCACCC    |                    | 138  |
| JQ794501 | 8820 | ACUGCACCGGCAGCAACUGUGGCAACAACUCAACCAGCUCAGUGAUACAACCUGCAAUU   |                    | 8879 |
|          |      | *****                                                         |                    |      |
| D00298   | 139  | CGGACUACGGCGCCAAUGCUCACCCCAUUUUCACGCCAGCAACAACUCAACCAGCAACA   |                    | 198  |
| JQ794501 | 8880 | CAAACCACAACACCAAUGUUAACCCCAUUUUCACUCCAGCAACAACUCAGCCUGCGAUA   |                    | 8939 |
|          |      | * * * * *                                                     |                    |      |
| D00298   | 199  | AAACCAGUUUCACAGGUGCCAGGACCUCAACUGCAAACUUUUGGAACAUAUGGUAUUGAG  |                    | 258  |
| JQ794501 | 8940 | AGACCAGUUUCUCCAUUUUCAGGGGCCACACCCGCAGUCUUUUGGAGUUUAUGGAAAUGAG |                    | 8999 |
|          |      | * * * * *                                                     |                    |      |
| D00298   | 259  | GAUGCAUCACCUAGCAACUCAAACGCGCUAGUCAACACAAACAGAGACAGGGACGUCGAU  |                    | 318  |
| JQ794501 | 9000 | GAUGCAUCACCUAGCACCUCAAACACUUUGGUGAACACAGGAAGGGAUAGGGACGUCGAU  |                    | 9059 |
|          |      | *****                                                         |                    |      |
| D00298   | 319  | GCAGGAUCAAUUGGAACUUUACAGUGCCACGUUUGAAGGCAAUGACUUCGAAACUAUCU   |                    | 378  |
| JQ794501 | 9060 | GCAGGAUCGAUUGGAACUUUCGAGUGCCACGCUUAAAAACAUGACAUCGAAGUUAUCU    |                    | 9119 |
|          |      | *****                                                         |                    |      |
| D00298   | 379  | CUGCCAAAGGUGAAGGGAAAGGCUAUAUAUGAACUUGAACCAUUUGGCACAUUAUGUCCU  |                    | 438  |
| JQ794501 | 9120 | CUACCGAAGGUGAAAGGAAAAGCAAUAUAUGAACUUAUAUCAUUUGGCACAGUACAGUCCU |                    | 9179 |
|          |      | * * * * *                                                     |                    |      |
| D00298   | 439  | GCACAGGUUGACUUGUCAAAACACGAGAGCUCGCGAGUCUUGUUCCAAACUUGGUAUGAA  |                    | 498  |
| JQ794501 | 9180 | GCACAAGUUGAUUUUAUCAAAACACGAGCUCACAAUCCUGUUUCCAGACUUGGUAUGAA   |                    | 9239 |
|          |      | *****                                                         |                    |      |
| D00298   | 499  | GGAGUUUAGCGAGAUUAUGAUGUCACGGACGAUGAAAUGAGCAUCAUUUUAAAUGGUCUU  |                    | 558  |
| JQ794501 | 9240 | GGAGUUUAGCGUGAUUACGAUGUCACAGAUGAGGAAAUGAGCAUCAUUUUUGAAUGCCUG  |                    | 9299 |
|          |      | *****                                                         |                    |      |
| D00298   | 559  | AUGGUUUGGUGCAUAGAGAAUGGAACAUCGCCGAAUAUCAUUGGAAUGUGGGUGAUGAUG  |                    | 618  |
| JQ794501 | 9300 | AUGGUUUGGUGCAUUGAAAACGGAACGUCUCCUAACAUCAACGGAUUGUGGGUGAUGAUG  |                    | 9359 |
|          |      | *****                                                         |                    |      |
| D00298   | 619  | GAUGGGGAAACACAAGUGGAGCAUCCAAUAAAAGCCAUUGUUGGAUCAUGCGAAACCCACU |                    | 678  |
| JQ794501 | 9360 | GAUGGGGAAACACAAGUGGAGUAUCCAAUAAAAGCCAUUGUUGGAUCACGCGAAACCCACU |                    | 9419 |
|          |      | *****                                                         |                    |      |
| D00298   | 679  | UUUAGACGAAUUGUGGCACGUUUCAGCGACGUGGCCGAAGCGUGUGGAAAAACGAAAU    |                    | 738  |
| JQ794501 | 9420 | UUUAGACAAAUAUGGCACAUUUCAGUAACGUGGCUGAAGCGUAUAUUGAAAAACGAAU    |                    | 9479 |
|          |      | *****                                                         |                    |      |
| D00298   | 739  | UACGAAAAAGCAUACAUGCCAAGGUAUGGAAUUCAGCGCAACCUGACAGACUACAGCCUC  |                    | 798  |
| JQ794501 | 9480 | UACGAGAAAGCAUACAUGCCAAGGUAUGGAAUUCAGCGCAACCUGACAGAUUACAGCCUC  |                    | 9539 |
|          |      | *****                                                         |                    |      |
| D00298   | 799  | GCCAGAUUAGCCUUUGAUUUUUACGAAAUGACUUAACGACACCCGUACGGGCACGUGAA   |                    | 858  |
| JQ794501 | 9540 | GCCAGAUUAGCCUUUGAUUUUUACGAAAUGACUUAACAACGCCUGUGCGUGCACGUGAA   |                    | 9599 |
|          |      | *****                                                         |                    |      |
| D00298   | 859  | GCUCAUAUCCAGAUGAAGGCAGCAGCAUUGAGAAAUGUUCAAAAUCGUUUUAUUUGGCUUG |                    | 918  |
| JQ794501 | 9600 | GCUCAUAUACAGAUGAAGGCAGCAGCAUUGAGAAAUGUUCAGAAUCGUUUUAUUUGGCUUG |                    | 9659 |
|          |      | *****                                                         |                    |      |

D00298 919 GAUGGAAACGUCGGAACACAGAAGCAGGACACAGAGAGACACACGGAUGGUGAUGUAAU 978  
JQ794501 9660 GAUGGAAACGUCGGAACACAAGAAGAGGACACAGAGAGACACACCGCUGGUGACGUGAAU 9719  
\*\*\*\*\* \* \*\*\*\*\* \* \*\*\*\*\* \*\* \*\*

D00298 979 CGCAACAUGCACACCUUCCUCGGUGUGAGGGGAGUGUAGUGGUCUCGGUAUCUAUCAUAA 1038  
JQ794501 9720 CGCAACAUGCACAACCUCCUCGGUGUGAGGGGAGUGUAGUGGUCUCGGUAUCUAUCAUAA 9779  
\*\*\*\*\* \* \*\*\*\*\*

D00298 1039 ACUCUACCGUG-UGAGAGUCUAAUCAUCCAGUUG-UUUUAGAUUCCUGUUAGCAUCCUUU 1096  
JQ794501 9780 ACUCUACUUGGGUGAGAGUCUAGUCACCCAAUUGGUUUUAGAUUCCUGUUAGCAUCCUUU 9839  
\*\*\*\*\* \*\* \*\*\*\*\* \*\* \*\* \*\* \*\*\*\*\*

D00298 1097 UCUCCGCUUUAAUAGCAGUACAUCAGUGAGGUUUUACCUCCAUAUGUUCUAGUCUGUUA 1156  
JQ794501 9840 UCUCCGCUUUAAUUGCGGCACAUCAGUGAGGUUGUACCUCCACAUGUGUUAGUCUUUUA 9899  
\*\*\*\*\* \*\* \* \*\*\*\*\* \*\*\*\*\* \*\* \*\*\*\*\* \*\*

D00298 1157 UUGUCGAACACAGGCCCUUGUAUCUGAUGUAGCGAGUGCUCCACUUCUUCGGGUUAUAG 1216  
JQ794501 9900 UUGUCGAACACAGGCCCUUGUAUCUGAUGUAGCGAGUGUUUCACUCCAUCUUCGGGUUAUAG 9959  
\*\*\*\*\* \* \*\*\*\* \*\*\*\*\*

D00298 1217 UUCUUGUGCAAGAGAC 1232  
JQ794501 9960 UUCUUGUGCAAGAGAC 9975  
\*\*\*\*\*
